# Supplementary material for: Manipulating microRNA miR408 enhances both biomass yield and saccharification efficiency in poplar
Source: PubMed Central journal article supplement (PMC10354043; doi:10.1038/s41467-023-39930-3), 2023-07-18
Supplement: 41467_2023_39930_MOESM3_ESM.pdf [file 41467_2023_39930_MOESM3_ESM.pdf]

## Description of Additional Supplementary Files

Supplementary Data 1. Predicated target genes of *miR408* in poplar.

Supplementary Data 2. Summary of *LAC* knockout sequences.

Supplementary Data 3. Oligonucleotide sequences for the primers and probes used in this study.

Supplementary Data 4. The aligned amino acid sequences used for phylogenetic analysis.
